# Supplementary material for: Separation performance of dithienyl benzothiadiazole-based stationary phases for capillary gas chromatography
Source: Royal Society of Chemistry journal article supplement (doi:10.1039/c7ra07827g), 2017-01-01
Supplement: c7ra07827g1.pdf [file c7ra07827g1.pdf]

## Electronic Supplementary Information

### **Separation performance of dithienyl benzothiadiazole-based stationary phases for capillary gas chromatography**

Jianlin Peng<sup>a,1</sup>, Tao Sun<sup>a,b,1</sup>, Lianqian Wu<sup>a,c</sup>, Meiling Qi<sup>a,\*</sup>, Xuebin Huang<sup>a,\*</sup>

<sup>a</sup> *Key Laboratory of Cluster Science, Ministry of Education of China, Beijing Key Laboratory of Photoelectronic/Electrophotonic Conversion Materials and School of Chemistry and Chemical Engineering, Beijing Institute of Technology, Beijing, 100081, China*

<sup>b</sup> *College of Chemistry and Chemical Engineering, and Henan Key Laboratory of Function- Oriented Porous Materials, Luoyang Normal University, Luoyang, 471934, China*

<sup>c</sup> *Shanghai Institute of Organic Chemistry, Chinese Academy of Sciences, 345 Lingling Road, Shanghai, 200032, China*

<sup>1</sup>These two authors contributed equally to this work.

\*Corresponding authors.

*E-mail addresses:* mlqi@bit.edu.cn (M.L. Qi), huangxb@bit.edu.cn (X.B. Huang)

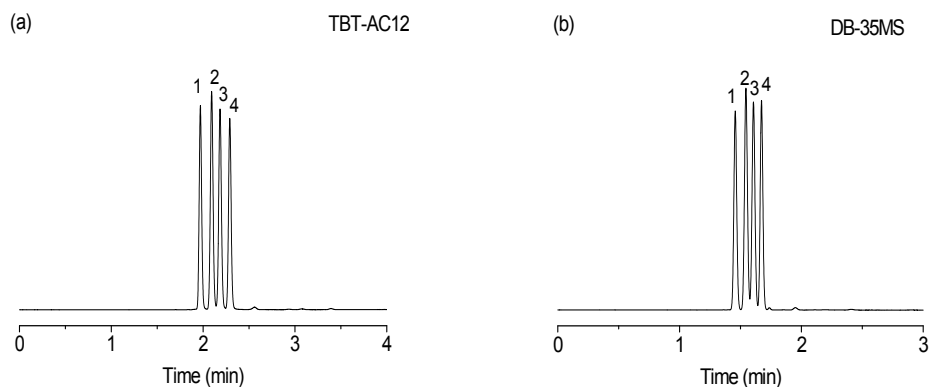

**Fig. S1.** Separation chromatograms for the hexane isomers on the TBT-AC12 and DB-35MS capillary columns. Peaks: (1) 2,2-dimethylbutane, (2) 2,3-dimethylbutane, (3) 3-methylpentane, (4) *n*-hexane. GC conditions: from 30 °C held for 3 min to 120 °C at 15 °C min<sup>-1</sup> at a flow rate of 0.4 mL min<sup>-1</sup>.

**Table S1**

Column repeatability and reproducibility on the retention times ( $t_R$ , min) of the isomers on the TBT-AA column ( $n = 4$ ).

| Analyte                      | Run-to-run |         | Day-to-day |         | Column-to-column |         |
|------------------------------|------------|---------|------------|---------|------------------|---------|
|                              | $t_R$      | RSD (%) | $t_R$      | RSD (%) | $t_R$            | RSD (%) |
| <i>m</i> -Dibromobenzene     | 3.612      | 0.12    | 3.672      | 1.7     | 3.907            | 4.7     |
| <i>p</i> -Dibromobenzene     | 3.799      | 0.10    | 3.861      | 1.8     | 4.112            | 4.7     |
| <i>o</i> -Dibromobenzene     | 4.164      | 0.10    | 4.235      | 1.7     | 4.525            | 4.7     |
| <i>m</i> -Chloronitrobenzene | 5.114      | 0.03    | 5.182      | 1.3     | 5.627            | 4.9     |
| <i>o</i> -Chloronitrobenzene | 5.443      | 0.02    | 5.512      | 1.3     | 6.022            | 5.0     |
| <i>p</i> -Chloronitrobenzene | 5.797      | 0.02    | 5.875      | 1.3     | 6.373            | 4.9     |

**Table S2**

Column repeatability and reproducibility on the retention times ( $t_R$ , min) of the isomers on the TBT-AC12 column ( $n = 4$ ).

| Analyte            | Run-to-run |         | Day-to-day |         | Column-to-column |         |
|--------------------|------------|---------|------------|---------|------------------|---------|
|                    | $t_R$      | RSD (%) | $t_R$      | RSD (%) | $t_R$            | RSD (%) |
| 2,2-Dimethylbutane | 2.024      | 0.07    | 2.026      | 1.3     | 1.970            | 1.8     |
| 2,3-Dimethylbutane | 2.156      | 0.09    | 2.158      | 1.3     | 2.093            | 1.8     |
| 3-Methylpentane    | 2.253      | 0.07    | 2.256      | 1.3     | 2.184            | 1.7     |
| Hexane             | 2.366      | 0.06    | 2.370      | 1.3     | 2.291            | 1.8     |
| <i>m</i> -Cymene   | 6.292      | 0.03    | 6.330      | 1.1     | 6.092            | 1.9     |
| <i>p</i> -Cymene   | 6.650      | 0.03    | 6.689      | 1.1     | 6.442            | 1.8     |
| <i>o</i> -Cymene   | 7.247      | 0.03    | 7.290      | 1.1     | 7.021            | 1.9     |
